# Supplementary material for: Incidence and Prognosis of Acute Kidney Diseases and Disorders Using an Integrated Approach to Laboratory Measurements in a Universal Health Care System
Source: PubMed Central journal article supplement (PMC6450331; doi:10.1001/jamanetworkopen.2019.1795), 2019-04-05
Supplement: jamanetwopen-2-e191795-s001.pdf [file jamanetwopen-2-e191795-s001.pdf]

## Supplementary Online Content

James MT, Levey AS, Tonelli M, et al. Incidence and prognosis of acute kidney diseases and disorders using an integrated approach to laboratory measurements in a universal health care system. *JAMA Netw Open*. 2019;2(4):e191795. doi:10.1001/jamanetworkopen.2019.1795

**eTable 1.** Criteria for Kidney Disease Improving Global Outcomes Definitions of Kidney Diseases and Disorders

**eTable 2.** Most Responsible Diagnosis Codes Used to Identify Coincident Acute Care Diagnoses Associated With AKI

**eTable 3.** Hazard Ratios From Multivariable Cox Proportional Hazards Model for Mortality and Subhazard Ratios From Fine and Grey Competing Risk Models for Nonfatal Outcomes for Demographic Characteristics, Comorbidities, and CKD, AKI, AKD Without AKI and Combinations of These States, Among Patients Who Received Scr Testing in 2008

**eTable 4.** Unadjusted and Adjusted Outcomes Restricted to Alberta Residents With eGFR > 60 mL/min/1.73m<sup>2</sup> Prior to the Index Dates (Excludes Patients With No Prior Scr Measurements) Who Received Scr Testing in 2008, According to CKD, AKI, AKD Without AKI, and Combinations of These States

**eTable 5.** Unadjusted and Adjusted Outcomes Restricted to Alberta Residents Without Albuminuria Prior to the Index Dates (Excludes Patients With Unmeasured, Moderate, or Severe Albuminuria) Who Received Scr Testing in 2008, According to CKD, AKI, AKD Without AKI, and Combinations of These States

**eTable 6.** Unadjusted and Adjusted Outcomes for Alberta Residents Who Received Scr Testing in 2008, Using an Alternate Definition for AKD Requiring an Index eGFR < 60 mL/min/1.73m<sup>2</sup> With a Decline > 10 mL/min/1.73m<sup>2</sup> From Previous Baseline or Subsequent Increase in Scr by 50% Within 7 Days to 3 Months

**eTable 7.** Categorical Net Reclassification Improvement (NRI) and Integrated Discrimination Improvement (IDI) With Addition of AKD Criteria to Kidney Disease Classification for Alberta Residents Who Received Scr Testing in 2008, According to CKD, AKI, AKD, and Combinations of These States

**eFigure 1.** Time Frames and Sequence of Steps for Using Serum Creatinine / Estimated Glomerular Filtration Rate and Albuminuria Determinations to Characterize NKD, CKD, AKD, AKI

**eFigure 2.** Study Cohort Formation

**eFigure 3.** Numbers of Participants With AKD Based on Meeting One of More of Each of the Criterion Used for AKD Identification

This supplementary material has been provided by the authors to give readers additional information about their work.

**eTable 1: Criteria for Kidney Disease Improving Global Outcomes Definitions of Kidney Diseases and Disorders**

| Criteria              | AKI                                                                                                             | AKD                                                                                                             | CKD                                      | NKD*                                                      |
|-----------------------|-----------------------------------------------------------------------------------------------------------------|-----------------------------------------------------------------------------------------------------------------|------------------------------------------|-----------------------------------------------------------|
| Duration              | Within 7 days                                                                                                   | ≤3 months                                                                                                       | >3 months                                |                                                           |
| Function Alteration   | Oliguria for ≥6 hours, or<br>Increase in Scr by ≥0.3 mg/dl in 48 hours, or<br>Increase in Scr by ≥50% in 7 days | AKI, or<br>GFR <60 ml/min/1.73 m <sup>2</sup> ,<br>or<br>Decrease in GFR by ≥35%, OR<br>Increase in Scr by ≥50% | GFR <60 ml/min/1.73 m <sup>2</sup>       | GFR ≥60 ml/min/1.73 m <sup>2</sup> ,<br>and<br>Stable Scr |
| Structural Alteration | Not defined                                                                                                     | Marker of kidney damage<br>(albuminuria)                                                                        | Marker of kidney damage<br>(albuminuria) | No marker of kidney damage                                |

**Abbreviations:** AKI = Acute Kidney Injury, AKD = Acute Kidney Diseases and Disorders, CKD = Chronic Kidney Disease, GFR = Glomerular Filtration Rate, NKD = No Kidney Disease, Scr = Serum creatinine

\*Implies no functional or structural criteria according to the definitions for AKI, AKD or CKD.

**eTable 2: Most responsible diagnosis codes used to identify coincident acute care diagnoses associated with AKI**

| Diagnosis*                                 | ICD Codes                                                                                                                                                                                                                                                                                                                                                                                                                              | Number (%) of Additional Participants Identified with AKI using Codes |
|--------------------------------------------|----------------------------------------------------------------------------------------------------------------------------------------------------------------------------------------------------------------------------------------------------------------------------------------------------------------------------------------------------------------------------------------------------------------------------------------|-----------------------------------------------------------------------|
| Sepsis                                     | ICD-9-CM 038.x, 112.5, 112.81, 02.02, 79.07, 78.559, ICD-10-CA A02.1, A22.7, A24.1, A26.7, A32.7, A40.0, A40.1, A40.2, A40.3, A40.8, A40.9, A41, A41.0, A41.1., A41.2, A41.3, A41.4, A41.5, A41.50, A41.51, A41.52, A41.58, A41.8, A41.80, A41.88, A41.9, A42.7, B37.7, B37.6, A01.0                                                                                                                                                   | 38 (1.2)                                                              |
| Pneumonia                                  | ICD-9-CM 460.x, 481, 482.x, 483.x, 484.x, 485, 486, ICD-10 J10.0, J11.0, J11.1, J12.9, J13, J14, J15.x, J16.8, J17.0, J17.2, J17.3, J17.8, J18.0, J18.1, J18.8, and J18.9                                                                                                                                                                                                                                                              | 284 (9.2)                                                             |
| Acute myocardial infarction                | ICD-9-CM 410.x, 412, ICD-10 I21, I22, I25.2                                                                                                                                                                                                                                                                                                                                                                                            | 101 (3.3)                                                             |
| Heart failure                              | ICD-9-CM 428.x, ICD-10 I50.x                                                                                                                                                                                                                                                                                                                                                                                                           | 146 (4.7)                                                             |
| Gastrointestinal hemorrhage                | ICD-9-CM 578.x, ICD-10-CA K92.0, K92.1, K92.2                                                                                                                                                                                                                                                                                                                                                                                          | 82 (2.7)                                                              |
| Acute pancreatitis                         | ICD-9-CM 577.0, ICD-10-CA K85.9, K85.0, K85.1, K85.2, K85.3, K85.8, K85.9                                                                                                                                                                                                                                                                                                                                                              | 34 (1.1)                                                              |
| Liver failure                              | ICD-9-CM 570, ICD-10-CA K72, K72.0, K72.1, K72.9                                                                                                                                                                                                                                                                                                                                                                                       | 17 (0.6)                                                              |
| Rhabdomyolysis                             | ICD-9-CM 728.88, ICD-10-CA M62.82, T79.6                                                                                                                                                                                                                                                                                                                                                                                               | 18 (0.6)                                                              |
| Cellulitis                                 | ICD 9-CM 682.9, ICD-10 L03.9, L03.91                                                                                                                                                                                                                                                                                                                                                                                                   | 158 (5.1)                                                             |
| Urinary Tract Infection                    | ICD-9-CM 599.0, ICD-10 N39.0                                                                                                                                                                                                                                                                                                                                                                                                           | 822 (26.7)                                                            |
| Diarrhea or enteritis                      | ICD-9CM 787.91, 008.8 ICD-10 K52.2, K52.89, R19.7, A08.8                                                                                                                                                                                                                                                                                                                                                                               | 616 (20.0)                                                            |
| Nausea and vomiting                        | ICD-9-CM 787.01, ICD-10 diagnosis codes R11.x                                                                                                                                                                                                                                                                                                                                                                                          | 237 (7.7)                                                             |
| Dehydration                                | ICD-9-CM 276.51, ICD-10 diagnosis code E86.0                                                                                                                                                                                                                                                                                                                                                                                           | 363 (11.8)                                                            |
| Acute tubular necrosis                     | ICD-9-CM diagnosis codes 584, 584.5, 584.6, 584.7, 584.8, 584.9, ICD-10 diagnosis codes N17, N17.0, N17.1, N17.2, 17.8, N17.9                                                                                                                                                                                                                                                                                                          | 163 (5.3)                                                             |
| Major surgery or interventional procedures | ICD-9-CM Procedure codes 36.1x, 36.2x, 38.34, 38.64, 38.44, 39.71, 93.90, 93.92, 96.01, 96.04, 96.05, 96.70, 96.71, 96.72, 36.01, 36.02, 36.05, 36.06<br>ICD-10 CA/CCI 1IJ76, 1HU90, 1HU80, 1HV90, 1HV80, 1HT90, 1HT80, 1HS90, 1HS80, 1HW, I71.4, 1.KA.80.LA-XXN or 1.KA.80.GQ-NRN, or CCI codes 1.KA.76.MZ-XXN or 1.KA.76.NB-XXN, 1.KA.50.GQ-OA (GQ-BD/GS-BD), 1.KE.50.GQ-OA (GQ-BD/GS-BD), 1.GZ.31, 31P10, 1IJ50, 1IJ5GQ, 1IJ57GQ-AZ | 0 (0)                                                                 |
| Total                                      |                                                                                                                                                                                                                                                                                                                                                                                                                                        | 3,079 (100)                                                           |

**Abbreviations:** AKI = Acute Kidney Injury, ICD = International Classification of Diseases

**eTable 3: Hazard ratios from multivariable Cox proportional hazards model for mortality and subhazard ratios from Fine and Grey competing risk models for nonfatal outcomes for demographic characteristics, comorbidities, and CKD, AKI, AKD without AKI and combinations of these states, among patients who received Scr testing in 2008**

| Variable                    | Hazard ratio (95% CI) | sub-Hazard ratio (95% CI) |                   |                      |
|-----------------------------|-----------------------|---------------------------|-------------------|----------------------|
|                             | Mortality             | CKD development           | CKD progression   | ESKD                 |
| Age (per 1 year)            | 1.08 (1.08, 1.08)     | 1.05 (1.05, 1.06)         | 1.02 (1.02, 1.02) | 0.99 (0.99, 0.99)    |
| Male sex                    | 1.34 (1.33, 1.36)     | 1.09 (1.08, 1.11)         | 1.15 (1.13, 1.17) | 1.89 (1.76, 2.04)    |
| Kidney disease categories   |                       |                           |                   |                      |
| NKD                         | Reference             | Reference                 | N/A               | Reference            |
| CKD                         | 1.37 (1.35, 1.39)     | N/A                       | Reference         | 21.54 (19.44, 23.87) |
| AKD                         | 1.42 (1.39, 1.45)     | 3.17 (3.1, 3.23)          | N/A               | 8.56 (7.32, 10.01)   |
| AKI                         | 3.23 (3.16, 3.31)     | 1.32 (1.26, 1.38)         | N/A               | 9.89 (8.12, 12.03)   |
| CKD+AKD                     | 1.92 (1.85, 2)        | N/A                       | 1.38 (1.33, 1.44) | 65.95 (55.91, 77.8)  |
| CKD+AKI                     | 3.3 (3.19, 3.41)      | N/A                       | 0.98 (0.93, 1.04) | 52.2 (43.2, 63.08)   |
| Cancer                      | 1.78 (1.75, 1.81)     | 0.94 (0.91, 0.98)         | 0.99 (0.95, 1.03) | 1.14 (0.98, 1.34)    |
| Myocardial infarction       | 1.18 (1.15, 1.2)      | 1.3 (1.25, 1.35)          | 1.22 (1.18, 1.27) | 1.38 (1.19, 1.6)     |
| Congestive heart failure    | 1.72 (1.69, 1.76)     | 1.52 (1.45, 1.58)         | 1.35 (1.29, 1.4)  | 1.9 (1.64, 2.2)      |
| Cerebrovascular disease     | 1.36 (1.34, 1.39)     | 0.94 (0.91, 0.99)         | 1.07 (1.02, 1.12) | 1.13 (0.94, 1.36)    |
| Peripheral vascular disease | 1.46 (1.41, 1.5)      | 1.22 (1.15, 1.29)         | 1.33 (1.25, 1.4)  | 2.11 (1.76, 2.53)    |
| Chronic pulmonary disease   | 1.62 (1.6, 1.65)      | 0.94 (0.91, 0.96)         | 1.15 (1.12, 1.18) | 0.95 (0.84, 1.08)    |
| Dementia                    | 2.53 (2.48, 2.58)     | 0.49 (0.46, 0.52)         | 0.59 (0.56, 0.62) | 0.15 (0.09, 0.25)    |
| Diabetes                    | 1.01 (0.99, 1.04)     | 2.08 (2.03, 2.14)         | 1.22 (1.18, 1.27) | 0.9 (0.76, 1.06)     |
| Metastatic carcinoma        | 2.79 (2.63, 2.95)     | 0.73 (0.62, 0.85)         | 0.94 (0.78, 1.13) | 0.51 (0.23, 1.15)    |
| Liver disease (mild)        | 2.25 (2.14, 2.37)     | 1.2 (1.09, 1.31)          | 1.52 (1.35, 1.71) | 2.2 (1.68, 2.9)      |
| Liver disease (mod/severe)  | 4.28 (3.98, 4.61)     | 1.28 (1.08, 1.53)         | 2.25 (1.76, 2.87) | 2.61 (1.72, 3.96)    |
| Peptic ulcer disease        | 1.05 (0.99, 1.12)     | 1.02 (0.93, 1.11)         | 1.06 (0.95, 1.18) | 1.22 (0.83, 1.79)    |
| Rheumatic disease           | 1.28 (1.23, 1.33)     | 1.08 (1.01, 1.14)         | 1.45 (1.35, 1.56) | 1.78 (1.39, 2.29)    |
| Paraplegia and hemiplegia   | 1.68 (1.53, 1.84)     | 0.75 (0.61, 0.92)         | 1.26 (0.99, 1.6)  | 1.54 (0.84, 2.83)    |
| Hypertension                | 0.89 (0.88, 0.91)     | 1.19 (1.17, 1.22)         | 1.01 (0.97, 1.04) | 1.48 (1.33, 1.64)    |

**Abbreviations:** CKD = Chronic Kidney Disease, AKI = Acute Kidney Injury, AKD = Acute Kidney Diseases and Disorders, ESKD = End Stage Kidney Disease

**eTable 4: Unadjusted and adjusted outcomes restricted to Alberta residents with eGFR > 60 mL/min/1.73m<sup>2</sup> prior to the index dates (excludes patients with no prior Scr measurements) who received Scr testing in 2008, according to CKD, AKI, AKD without AKI and combinations of these states**

| Outcome                                                                                                                                                                                                            | Events,       | Total Follow-up, Years | Crude Hazard Ratio* (95% CI) | Age and Sex-adjusted Hazard Ratio† (95% CI) | Multivariable-adjusted Hazard Ratio* (95% CI) |
|--------------------------------------------------------------------------------------------------------------------------------------------------------------------------------------------------------------------|---------------|------------------------|------------------------------|---------------------------------------------|-----------------------------------------------|
|                                                                                                                                                                                                                    | n (%)         |                        |                              |                                             |                                               |
| <b>Mortality (N= 797,594)</b>                                                                                                                                                                                      |               |                        |                              |                                             |                                               |
| NKD                                                                                                                                                                                                                | 52,185 (7.4)  | 5,413,829              | [Reference]                  | [Reference]                                 | [Reference]                                   |
| CKD+AKD w/o AKI                                                                                                                                                                                                    | 890 (34.0)    | 17,264                 | 5.35 (5.00, 5.71)            | 1.83 (1.71, 1.95)                           | 1.74 (1.62, 1.86)                             |
| CKD+AKI                                                                                                                                                                                                            | 596 (55.6)    | 5,156                  | 11.88 (10.96, 12.88)         | 5.7 (5.26, 6.18)                            | 3.99 (3.68, 4.33)                             |
| AKD without AKI                                                                                                                                                                                                    | 8,362 (24.7)  | 23,4371                | 3.7 (3.62, 3.79)             | 1.53 (1.5, 1.57)                            | 1.39 (1.36, 1.43)                             |
| AKI                                                                                                                                                                                                                | 5,315 (48.3)  | 58,142                 | 9.42 (9.16, 9.69)            | 4.82 (4.69, 4.96)                           | 3.31 (3.22, 3.41)                             |
| CKD                                                                                                                                                                                                                | 5,808 (13.6)  | 318,121                | 1.89 (1.84, 1.95)            | 1.52 (1.48, 1.57)                           | 1.48 (1.44, 1.52)                             |
| <b>CKD Development for those without CKD (N=751,196)</b>                                                                                                                                                           |               |                        |                              |                                             |                                               |
| NKD                                                                                                                                                                                                                | 48,941 (6.9)  | 5,209,582              | [Reference]                  | [Reference]                                 | [Reference]                                   |
| AKD without AKI                                                                                                                                                                                                    | 12,037 (35.6) | 164,361                | 6.74 (6.6, 6.89)             | 3.91 (3.82, 4.00)                           | 3.89 (3.8, 3.99)                              |
| AKI                                                                                                                                                                                                                | 1,524 (13.9)  | 50,012                 | 2.16 (2.05, 2.28)            | 1.27 (1.21, 1.35)                           | 1.27 (1.2, 1.35)                              |
| <b>CKD Progression for those with CKD (N=46,398)</b>                                                                                                                                                               |               |                        |                              |                                             |                                               |
| CKD                                                                                                                                                                                                                | 11,292 (26.4) | 280,869                | [Reference]                  | [Reference]                                 | [Reference]                                   |
| CKD+AKD w/o AKI                                                                                                                                                                                                    | 1,122 (42.9)  | 13,563                 | 1.86 (1.75, 1.98)            | 1.18 (1.1, 1.26)                            | 1.15 (1.07, 1.23)                             |
| CKD+AKI                                                                                                                                                                                                            | 435 (40.6)    | 3,646                  | 1.89 (1.7, 2.1)              | 1.29 (1.15, 1.45)                           | 1.17 (1.05, 1.32)                             |
| <b>ESKD (N= 797,594)</b>                                                                                                                                                                                           |               |                        |                              |                                             |                                               |
| NKD                                                                                                                                                                                                                | 345 (0.1)     | 5,413,032              | [Reference]                  | [Reference]                                 | [Reference]                                   |
| CKD+AKD w/o AKI                                                                                                                                                                                                    | 74 (2.8)      | 17,088                 | 58.06 (45.15, 74.65)         | 68.03 (51.57, 89.75)                        | 58.27 (44, 77.16)                             |
| CKD+AKI                                                                                                                                                                                                            | 26 (2.4)      | 5,084                  | 49.62 (33.24, 74.08)         | 54.2 (36.01, 81.58)                         | 37.31 (24.31, 57.28)                          |
| AKD without AKI                                                                                                                                                                                                    | 114 (0.3)     | 23,4267                | 6.84 (5.54, 8.46)            | 8.15 (6.5, 10.22)                           | 7.21 (5.72, 9.09)                             |
| AKI                                                                                                                                                                                                                | 64 (0.6)      | 58,170                 | 11.78 (9.02, 15.39)          | 12.58 (9.53, 16.6)                          | 8.58 (6.35, 11.59)                            |
| CKD                                                                                                                                                                                                                | 258 (0.6)     | 317,576                | 12.35 (10.51, 14.51)         | 12.06 (10.24, 14.2)                         | 11.17 (9.46, 13.18)                           |
| *Full multivariable adjusted models adjusted for age, sex, socio-economic status, Aboriginal ethnicity, individual Charlson comorbidities, and hypertension.                                                       |               |                        |                              |                                             |                                               |
| † Hazard ratios were determined using Cox proportional hazards models for mortality, and subhazard ratios were determined using Fine and Gray competing risk models for CKD Development, CKD Progression, and ESKD |               |                        |                              |                                             |                                               |
| <b>Abbreviations:</b> CKD = Chronic Kidney Disease, AKI = Acute Kidney Injury, AKD = Acute Kidney Diseases and Disorders, ESKD = End Stage Kidney Disease                                                          |               |                        |                              |                                             |                                               |

**eTable 5: Unadjusted and adjusted outcomes restricted to Alberta residents without albuminuria prior to the index dates (excludes patients with unmeasured, moderate or severe albuminuria) who received Scr testing in 2008, according to CKD, AKI, AKD without AKI and combinations of these states**

| Outcome                                                                                                                                                                                                            | Events,      | Total Follow-up,<br>Years | Crude Hazard Ratio*<br>(95% CI) | Age and Sex-adjusted<br>Hazard Ratio† (95% CI) | Multivariable-adjusted<br>Hazard Ratio* (95% CI) |
|--------------------------------------------------------------------------------------------------------------------------------------------------------------------------------------------------------------------|--------------|---------------------------|---------------------------------|------------------------------------------------|--------------------------------------------------|
|                                                                                                                                                                                                                    | n (%)        |                           |                                 |                                                |                                                  |
| <b>Mortality (N= 575,263)</b>                                                                                                                                                                                      |              |                           |                                 |                                                |                                                  |
| NKD                                                                                                                                                                                                                | 29,079 (5.4) | 412,2154                  | [Reference]                     | [Reference]                                    | [Reference]                                      |
| CKD+AKD w/o AKI                                                                                                                                                                                                    | 95 (66.0)    | 661                       | 21.27 (17.39, 26.02)            | 3.31 (2.71, 4.05)                              | 2.76 (2.26, 3.38)                                |
| CKD+AKI                                                                                                                                                                                                            | 380 (70.5)   | 2,146                     | 26.2 (23.67, 28.99)             | 4.19 (3.79, 4.64)                              | 3.41 (3.08, 3.78)                                |
| AKD without AKI                                                                                                                                                                                                    | 2,764 (21.5) | 92,212                    | 4.28 (4.12, 4.45)               | 1.28 (1.23, 1.34)                              | 1.24 (1.19, 1.29)                                |
| AKI                                                                                                                                                                                                                | 1,662 (48.2) | 18,328                    | 13.04 (12.41, 13.7)             | 4.82 (4.58, 5.07)                              | 3.13 (2.97, 3.29)                                |
| CKD                                                                                                                                                                                                                | 8,008 (32.2) | 170,382                   | 6.76 (6.6, 6.93)                | 1.26 (1.22, 1.29)                              | 1.23 (1.19, 1.26)                                |
| <b>CKD Development for those without CKD (N= 549,730)</b>                                                                                                                                                          |              |                           |                                 |                                                |                                                  |
| NKD                                                                                                                                                                                                                | 40,797 (7.6) | 3,940,436                 | [Reference]                     | [Reference]                                    | [Reference]                                      |
| AKD without AKI                                                                                                                                                                                                    | 5,805 (45.1) | 58,634                    | 8.24 (8, 8.49)                  | 3.34 (3.22, 3.45)                              | 3.30 (3.19, 3.41)                                |
| AKI                                                                                                                                                                                                                | 787 (22.8)   | 14,225                    | 3.52 (3.27, 3.8)                | 1.48 (1.36, 1.61)                              | 1.37 (1.26, 1.5)                                 |
| <b>CKD Progression for those with CKD (N= 25,533)</b>                                                                                                                                                              |              |                           |                                 |                                                |                                                  |
| CKD                                                                                                                                                                                                                | 9,368 (37.7) | 143,360                   | [Reference]                     | [Reference]                                    | [Reference]                                      |
| CKD+AKI                                                                                                                                                                                                            | 87 (60.4)    | 319                       | 2.48 (1.9, 3.22)                | 2.25 (1.72, 2.95)                              | 2.04 (1.55, 2.69)                                |
| CKD+AKD w/o AKI                                                                                                                                                                                                    | 227 (42.1)   | 1,486                     | 1.27 (1.1, 1.46)                | 1.16 (1, 1.34)                                 | 1.07 (0.92, 1.25)                                |
| <b>ESKD (N= 575,263)</b>                                                                                                                                                                                           |              |                           |                                 |                                                |                                                  |
| NKD                                                                                                                                                                                                                | 225 (0.04)   | 4,121,614                 | [Reference]                     | [Reference]                                    | [Reference]                                      |
| CKD+AKD w/o AKI                                                                                                                                                                                                    | 11 (0.7)     | 673                       | 16.22 (2.28, 115.3)             | 17.41 (2.35, 128.69)                           | 11.25 (1.47, 86.2)                               |
| CKD+AKI                                                                                                                                                                                                            | 15 (0.9)     | 2,168                     | 21.82 (8.99, 52.94)             | 22.56 (8.81, 57.77)                            | 17.20 (6.63, 44.6)                               |
| AKD without AKI                                                                                                                                                                                                    | 37 (0.3)     | 92,174                    | 6.72 (4.74, 9.52)               | 6.94 (4.62, 10.43)                             | 6.37 (4.2, 9.66)                                 |
| AKI                                                                                                                                                                                                                | 20 (0.6)     | 18,369                    | 13.37 (8.45, 21.15)             | 13.54 (8.31, 22.05)                            | 9.08 (5.26, 15.68)                               |
| CKD                                                                                                                                                                                                                | 125 (0.5)    | 170,145                   | 11.70 (9.4, 14.56)              | 12.38 (8.62, 17.8)                             | 11.42 (7.82, 16.68)                              |
| *Full multivariable adjusted models adjusted for age, sex, socio-economic status, Aboriginal ethnicity, individual Charlson comorbidities, and hypertension.                                                       |              |                           |                                 |                                                |                                                  |
| † Hazard ratios were determined using Cox proportional hazards models for mortality, and subhazard ratios were determined using Fine and Gray competing risk models for CKD Development, CKD Progression, and ESKD |              |                           |                                 |                                                |                                                  |
| <b>Abbreviations:</b> CKD = Chronic Kidney Disease, AKI = Acute Kidney Injury, AKD = Acute Kidney Diseases and Disorders, ESKD = End Stage Kidney Disease                                                          |              |                           |                                 |                                                |                                                  |

**eTable 6: Unadjusted and adjusted outcomes for Alberta residents who received Scr testing in 2008, using an alternate definition for AKD requiring an index eGFR < 60 ml/min/1.73m<sup>2</sup> with a decline > 10 mL/min/1.73m<sup>2</sup> from previous baseline or subsequent increase in Scr by 50% within 7 days to 3 months**

| Outcome                                                                                                                                                                                                            | Events,       | Total Follow-up,<br>Years | Crude Hazard Ratio*<br>(95% CI) | Age and Sex-adjusted<br>Hazard Ratio* (95% CI) | Multivariable-adjusted<br>Hazard Ratio* (95% CI) |
|--------------------------------------------------------------------------------------------------------------------------------------------------------------------------------------------------------------------|---------------|---------------------------|---------------------------------|------------------------------------------------|--------------------------------------------------|
|                                                                                                                                                                                                                    | n (%)         |                           |                                 |                                                |                                                  |
| <b>Mortality (N= 1,109,099)</b>                                                                                                                                                                                    |               |                           |                                 |                                                |                                                  |
| NKD                                                                                                                                                                                                                | 69,824 (7.5)  | 7,093,412                 | [Reference]                     | [Reference]                                    | [Reference]                                      |
| CKD+AKD w/o AKI                                                                                                                                                                                                    | 2,532 (49.0)  | 29,722                    | 8.63 (8.29, 8.97)               | 2.16 (2.08, 2.25)                              | 1.99 (1.91, 2.07)                                |
| CKD+AKI                                                                                                                                                                                                            | 3,585 (71.5)  | 19,574                    | 18.33 (17.73, 18.96)            | 4.19 (4.05, 4.34)                              | 3.30 (3.19, 3.41)                                |
| AKD without AKI                                                                                                                                                                                                    | 8,771 (26.3)  | 226,859                   | 3.92 (3.84, 4.01)               | 1.68 (1.64, 1.72)                              | 1.57 (1.54, 1.61)                                |
| AKI                                                                                                                                                                                                                | 7,964 (50.5)  | 80,864                    | 9.92 (9.69, 10.15)              | 4.47 (4.36, 4.57)                              | 3.23 (3.16, 3.31)                                |
| CKD                                                                                                                                                                                                                | 35,261 (29.5) | 811,360                   | 4.41 (4.36, 4.47)               | 1.42 (1.4, 1.44)                               | 1.37 (1.35, 1.39)                                |
| <b>CKD Development for those without CKD (N=979,380)</b>                                                                                                                                                           |               |                           |                                 |                                                |                                                  |
| NKD                                                                                                                                                                                                                | 72,515 (7.8)  | 6,765,142                 | [Reference]                     | [Reference]                                    | [Reference]                                      |
| AKD without AKI                                                                                                                                                                                                    | 11,724 (35.1) | 159,241                   | 5.77 (5.65, 5.89)               | 3.04 (2.97, 3.11)                              | 2.98 (2.91, 3.05)                                |
| AKI                                                                                                                                                                                                                | 3,066 (19.4)  | 65,813                    | 2.83 (2.73, 2.94)               | 1.34 (1.28, 1.4)                               | 1.24 (1.18, 1.29)                                |
| <b>CKD Progression for those with CKD (N=129,719)</b>                                                                                                                                                              |               |                           |                                 |                                                |                                                  |
| CKD                                                                                                                                                                                                                | 41,453 (34.7) | 686,404                   | [Reference]                     | [Reference]                                    | [Reference]                                      |
| CKD+AKD w/o AKI                                                                                                                                                                                                    | 2,577 (49.9)  | 21,687                    | 1.7 (1.63, 1.77)                | 1.43 (1.37, 1.49)                              | 1.39 (1.33, 1.45)                                |
| CKD+AKI                                                                                                                                                                                                            | 2,064 (41.2)  | 13,488                    | 1.37 (1.31, 1.44)               | 1.06 (1.01, 1.12)                              | 0.98 (0.93, 1.03)                                |
| <b>ESKD (N= 1,109,099)</b>                                                                                                                                                                                         |               |                           |                                 |                                                |                                                  |
| NKD                                                                                                                                                                                                                | 679 (0.1)     | 7,091,769                 | [Reference]                     | [Reference]                                    | [Reference]                                      |
| CKD+AKD w/o AKI                                                                                                                                                                                                    | 218 (4.2)     | 29,174                    | 58.45 (50.17, 68.09)            | 74.74 (63.08, 88.55)                           | 65.64 (55.26, 77.98)                             |
| CKD+AKI                                                                                                                                                                                                            | 176 (3.5)     | 19,195                    | 48.68 (41.21, 57.49)            | 64.70 (53.84, 77.75)                           | 49.65 (41.13, 59.94)                             |
| AKD without AKI                                                                                                                                                                                                    | 210 (0.6)     | 226,469                   | 8.58 (7.35, 10.01)              | 9.97 (8.5, 11.68)                              | 9.00 (7.66, 10.57)                               |
| AKI                                                                                                                                                                                                                | 135 (0.9)     | 80,752                    | 11.65 (9.69, 14.02)             | 12.71 (10.52, 15.36)                           | 9.50 (7.81, 11.55)                               |
| CKD                                                                                                                                                                                                                | 1,628 (1.4)   | 806,911                   | 18.6 (17.01, 20.34)             | 22.01 (19.92, 24.3)                            | 20.94 (18.92, 23.16)                             |
| * Hazard ratios were determined using Cox proportional hazards models for mortality, and subhazard ratios were determined using Fine and Gray competing risk models for CKD Development, CKD Progression, and ESKD |               |                           |                                 |                                                |                                                  |
| <b>Abbreviations:</b> CKD = Chronic Kidney Disease, AKI = Acute Kidney Injury, AKD = Acute Kidney Diseases and Disorders, ESKD = End Stage Kidney Disease                                                          |               |                           |                                 |                                                |                                                  |



**eTable 7: Categorical net reclassification improvement (NRI) and integrated discrimination improvement (IDI) with addition of AKD criteria to kidney disease classification for Alberta residents who received Scr testing in 2008, according to CKD, AKI, AKD and combinations of these states**

| Outcome                                      | Comparisons*                                             | NRI events, n (%) | Non-NRI events, n (%) | Overall NRI, % [95%CI] | IDI, % (95%CI)    |
|----------------------------------------------|----------------------------------------------------------|-------------------|-----------------------|------------------------|-------------------|
| <b>Mortality</b>                             | AKI, CKD, AKD, CKD+AKI, CKD+AKD versus AKI, CKD, CKD+AKI | 139 (0.11)        | 3140 (0.32)           | 0.43 (0.31, 0.54)      | 0.29 (0.26, 0.32) |
| <b>CKD development for those without CKD</b> | AKI, AKD versus AKI                                      | -1,358 (-1.55)    | 29,831 (3.34)         | 1.79 (0.46, 3.11)      | 3.07 (0.35, 5.79) |
| <b>CKD progression for those with CKD</b>    | CKD+AKI, CKD+AKD versus CKD+AKI                          | 36 (0.08)         | 359 (0.42)            | 0.51 (0.38, 0.65)      | 0.33 (0.27, 0.39) |
| <b>ESKD</b>                                  | AKI, CKD, AKD, CKD+AKI, CKD+AKD versus AKI, CKD, CKD+AKI | 378 (12.40)       | -20,434 (-1.85)       | 10.56 (7.84, 13.15)    | 0.61 (0.39, 0.84) |

\*All models included age, sex, socioeconomic status, Aboriginal ethnicity, hypertension, and each Charlson comorbidity as independent variables in addition to the kidney disease classifications included in the comparisons

The NRI and IDI were estimated at 8 years follow-up time. Categorical NRI risk categories were <1%, 1-5%, 5-10%, 10-20% and >20%

**eFigure 1: Time frames and sequence of steps for using serum creatinine / estimated glomerular filtration rate and albuminuria determinations to characterize NKD, CKD, AKD, AKI.**

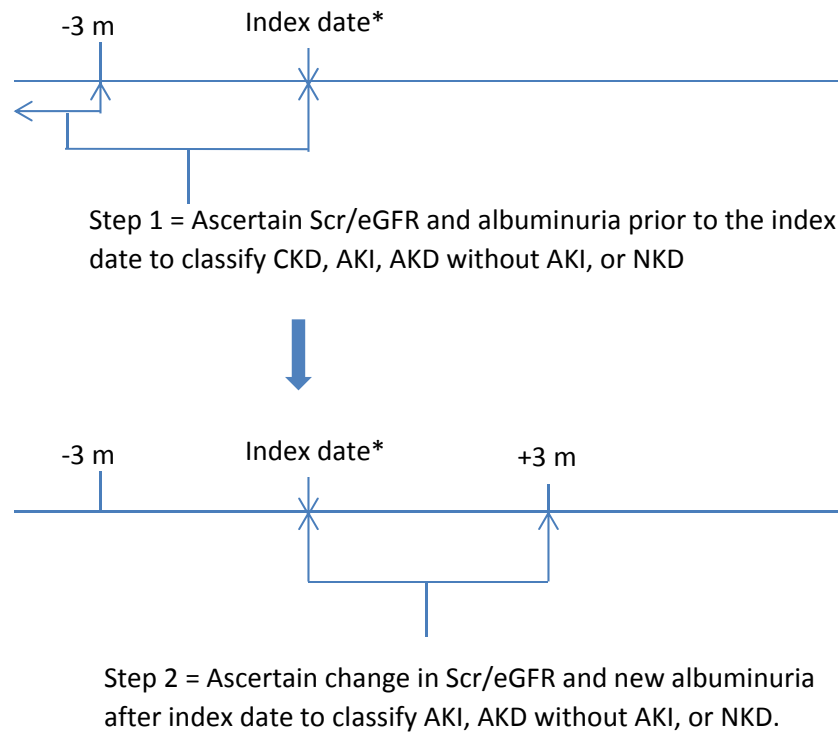

\*The index date was defined by each patient's first serum creatinine / estimated glomerular filtration rate determination in 2008.

Abbreviations: NKD = No Kidney Disease, CKD = Chronic Kidney Disease, AKI = Acute Kidney Injury, AKD = Acute Kidney Diseases and Disorders.

**eFigure 2: Study cohort formation**

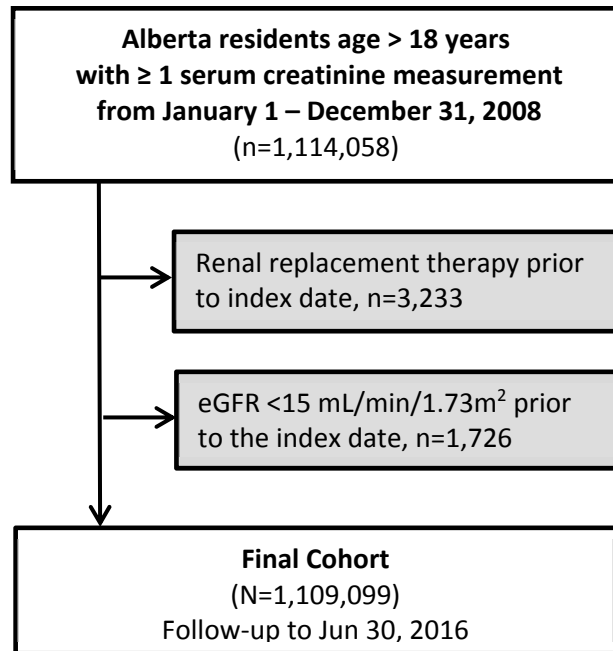

**eFigure 3: Numbers of participants with AKD based on meeting one of more of each of the criterion used for AKD identification**

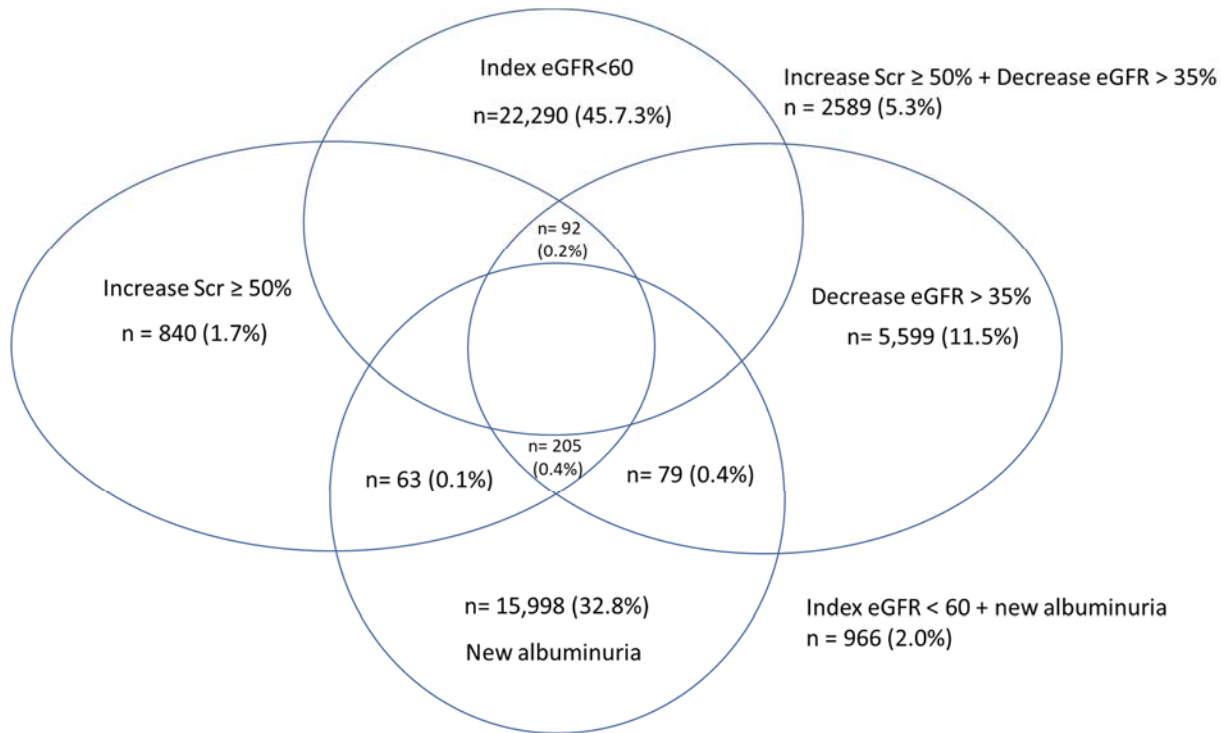

\*The number and percentage of study participants based on combinations of the AKD criterion are shown for all scenarios that comprised >0.1% of all patients with AKD.
